# Supplementary material
Source: publisher figshare collection journal article supplement (https://tandf.figshare.com/articles/dataset/_/7981721)
Supplement: Supplementary file 1 [file 1]

## Sheet: Table S3
Table S3. Summary of available data on microplastics ingestion by coastal fish species
Location	Species	Habitat	Tissue	N and # individual ingested MPs (%)	Concentration on (#/animal)1	Number of microplastic (particle/g ww)	Plastics size (mm) Mean/Range	Shape(s)	Type of polymer	Methods	Quality Assurance	Reference
Asia
Indonesia, Makassar	Rastrelliger kanagurta (Indian mackerel)	Pelagic	GIT	9 (55.5)	1.0 ± 1.1		Length: 3.5 ± 1.1; Width: 0,1 - 4,5	fragment, film, monofilm	NR*	Microscopic dissection	+	Rochman et al. 2015
	Spratelloides gracilis (Blue sprat)	Pelagic		10 (40)	1.1 ± 1.7			fragments
	Siganus canaliculatus (White-spotted spinefoot)	Pelagic		3 (33.3)	0.3 ± 0.6			monofilament
Malaysia, local markets	Chelon subviridis (Greenback mullet)	Demersal	viscera & gills	30 (30)	2		0.001 - > 10	fragments, films, and filaments	nylon 6, PE, PET, PP, PS	Stereomicroscopy, Raman microscopy	+	Karami et al. 2017
			flesh*		14
	Johnius belangerii (Belanger's croaker)	Demersal	viscera & gills	30 (40)	3
			flesh*		13
	Ratrelliger kanagurta (Indian mackerel)	Pelagic-neritic	viscera & gills	30 (10)	2
			flesh*		1
	Stolephorus waitei (Spotty-face anchovy)	Pelagic-neritic	flesh*	30 (5)	1
China, Yangtze estuary	Hyporhamphus intermedius (Garfish)	Pelagic	GIT (stomach and gut)	18 (100)	3.7 ± 2.2		<2 - 25	fibres, fragments and pellets	cellophane, PET, PL, etc	Stereomicroscopy, FTIR microscopy	+	Jabeen et al. 2017
	Liza haemotocheila (Mullet)	Pelagic		18 (100)	3.3 ± 0.3
	Coilia ectenes (Anchovy)	Pelagic		18 (100)	4.0 ± 1.8
	Lateolabrax japonicus (Japan sea bass)	Pelagic		18 (100)	2.1 ± 0.3
	Sillago sihama (Silver sillago)	Pelagic		18 (100)	2.8 ± 1.5
	Larimichthys crocea (Large yellow croaker)	Benthopelagic		18 (100)	4.6 ± 3.4
	Psenopsis anomala (Pacific rudderfish)	Benthopelagic		18 (100)	1.1 ± 0.3
	Mugil cephalus (Black mullet)	Demersal		18 (100)	3.7 ± 1.0
	Terapon jarbua (Tiger perch)	Demersal		18 (100)	3.0 ± 0.7
	Sebastiscus marmoratus (False kelpfish)	Demersal		18 (100)	4.2 ± 1.3
	Photopectoralis bindus (Orangefin ponyfish)	Demersal		18 (100)	4.1 ± 2.1
	Thamnaconus septentrionalis (Greenfin filefish)	Demersal		18 (100)	7.2 ± 2.8
	Oxyeleotrix marmorata (Marbled goby)	Demersal		18 (100)	4.2 ± 2.4
Japan, Tokyo Bay	Engraulis japonicus (Japanese anchovy)	Benthic	GIT	64 (77)	2.3 ± 2.5		Length: 0.15 - 6.83 Width: 0.068 - 1.88	fragments, beads, filaments, foam	PP, PE, PS, ethylene/propylene copolymer, ethylene/propylene/diene terpolymer	Microscopy, FTIR	+	Tanaka & Takada 2016
India, Punnapara, Kerala	Stolephorus commersonnii (Commerson's anchovy)	Brackish, pelagic-neritic	Gut	16 (38)	NR		Length: 1.14 - 2.5	NR	NR	Microscopy, FTIR	NR	Kripa et a. 2014
Iran, Persian Gulf	Alepes djedaba (Shrimp scad)	Pelagic, reef	muscle	20 (NR)	0.8 ± 0.12a		0.1 - >5	fragment, fibre, pellet	NR	Microscopy, SEM	+	Akhbarizadeh et al. 2017
	Epinephelus coioides (Estuary cod)	Benthic, brackish		20 (NR)	0.78 ± 0.22a
	Sphyraena jello (Picklehand barracuda)	Pelagic, brackish		15 (NR)	0.57 ± 0.17a
	Platycephalus indicus (Bar-tailed flathead)	Benthic		16 (NR)	1.85 ± 0.5a
Europe
Greece, Eastern Aegean Sea	Sphyraena viridensis (Yellow barracuda)	Epipelagic	Stomach	NR	42 + 20.5	0.055 + 0.047	NR	fibre	NR	Microscopy	NR	Miliou et al. 2016
	Trachurus mediterraneus (Mediterranean horse mackerel)	Pelagic			28 + 19.5	0.157 + 0.173
	Boops boops (Bogue)	Demersal			15.4 + 3.2	0.204 + 0.05
Turkey, Mediterranean coast	Argyrosomus regius (Meagre)	Benthopelagic	GIT	51 (75)	2.47		0.00907 - >5	Fibers, hard plastics. Blue (the most dominant)	Copolymer PS:isopropene, alloys (HIPPS/PP/PA6), PA resin, PE, PP, rubber	Stereomicroscopy, FTIR microscopy	+	Guven et al. 2017
	Caranx crysos (Blue runner)	Reef		1 (100)	5
	Dentex gibbosus (Pink dentex)	Benthopelagic		14 (29)	1
	Diplodus annularis (Annular seabream)	Benthopelagic		48 (69)	2.85
	Lithognathus mormyrus (Sand seenbras)	Demersal		46 (35)	1.88
	Liza aurata (Golden grey mullet)	Pelagic-neritic		39 (44)	7.47
	Mullus barbatus (Blunt-snouted mullet)	Demersal		207 (66)	2.12
	Mullus surmuletus (Stripped red mullet)	Demersal		51 (65)	1.82
	Nemipterus randalli (Randall's threadfin bream)	Demersal		135 (55)	2.24
	Pagellus acarne (Axillary seabream)	Benthopelagic		52 (67)	2.46
	Pagellus erythrinus (Common pandora)	Benthopelagic		54 (52)	1.21
	Pagrus pagrus (Common seabream)	Benthopelagic		9 (78)	1.86
	Pelates quadrillineatus (Fourlined terapon)	Reef		135 (65)	2.27
	Pomadasys incisus (Bastard grunt)	Demersal		29 (55)	1.44
	Sardina philcardus (European philcard)	Pelagic-neritic		7 (57)	3.75
	Saurida undosquamis (Brushtooth lizardfish)	Reef		99 (55)	2.2
	Sciaena umbra (Brown meagre)	Demersal		1 (100)	3
	Scomber japonicus (Pacific chub mackerel)	Pelagic-neritic		7 (71)	9.4
	Serranus cabrilla (Comber)	Demersal		6 (67)	2.25
	Siganus luridus (Dusky spinefoot)	Reef		15 (87)	3.62
	Sparus aurata (Gilthead seabream)	Demersal		110 (44)	2
	Trachurus mediterraneus (Mediterranean horse mackerel)	Pelagic-ocenic		98 (68)	2.58
Spain, Atlantic and Mediterranean coasts	Mullus barbatus (Blunt-snouted mullet)	Demersal	Stomach	128 (18.8)	1.90 ± 1.29		0.38 - 3.1	Fibres, spheres, films, fragments	NR	Stereomicroscopy	+	Bellas et al. 2016
Spain, Balearic Islands	Boops boops (Bogue)	Demersal	GIT	337 (57.8)	2.47 - 4.89		0.12 -0.75	Microfilament	NR	Stereomicroscopy	+	Nadal et al. 2016
Spains, ports of Mallorca Island (5 different ports)	Mullus surmuletus Linnaeus 1758 (Stripped red mullet)	Demersal	GIT	417 (27.3)			NR	Mostly filaments	PET, CA, polyacrylate, PAN, alkyd, polystyrene acrilonitrile methyl methacrylate	FTIR microscopy	+	Alomar et al. 2017
	(trawling net)				0.32 ± 0.04
	(trammel net)				0.68 ± 0.10
Spain, western Mediterranean Sea	Boops boops (Bogue)	Demersal	GIT	27	1.46 + 0.66		NR	Mostly fibres	NR	Microscopic dissection	+	Ferrer et al. 2016
	Sardina pilchardus (European philchard)	Pelagic, near shore		17	1.43 + 0.79
	Engraulis encrasicolus (Anchovy)	Pelagic		17	1.18 + 0.40
				Total: 183 (17)
Portugal, Atlantic coast	Alosa fallax (Twaite shad)	Pelagic-neritic	GIT	1 (100)	1		2.11 ±1.67	Particles and fibres	Particles: PP, PE, and alkyd resin. Fibres: rayon, PL, acrylic, nylon 6, and PE	Stereomicroscopy, µ-FTIR microscopy	+	Neves et al. 2015
	Argyrosomus regius (Meagre)	Benthopelagic		5 (60)	0.8 ± 0.8
	Boops boops (Bogue)	Demersal		32 (9)	0.09 ± 0.3
	Dentex macropththalmus (Large-eye dentex)	Benthopelagic		1 (100)	1
	Lophius piscatorius (Angler)	Bathydemersal		2 (50)	0.5
	Mullus surmuletus (Stripped red mullet)	Demersal		1 (100)	2
	Mullus surmuletus (Stripped red mullet)	Demersal		3 (100)	1.66 ± 0.57
	Scomber japonicus (Chub mackerel)	Pelagic-neritic		35 (31)	0.57 ± 1.04
	Scomber scrombus (Atlantic mackerel)	Pelagic-neritic		13 (31)	0.46 ± 0.78
France, Mediterranean Sea	Engraulis encrasicolus, L. (Anchovy)	Pelagic	Liver	NR	NR		0.323 + 0.101	NR	PE, copolymer of styrene and acrylonitrile	Stereomicroscopy, Raman spectroscopy	+	Collard et al. 2017
	Sardina pilchardus (European philchard)	Pelagic, near shore					0.124 - 0.438
	Clupea harengus (Atlantic herring)	Pelagic, coastal
German, North Sea and Baltic Sea	Limanda limanda (Common dab)	Demersal	GIT	89 (4.5)	0.03 + 0.18		0.18 - <5	Fibres, fragments	PE, PA, PP, PS, PET, PEST, PU	Stereomicroscopy, ATR-FTIR, FTIR microscopy	+	Rummel et al. 2016
	Platichthys flesus (Baltic flounder)	Demersal		36 (5.6)
	Gardus morhua (Atlantic cod)	Brackish, benthopelagic		81 (1.2)	0.19 + 0.61
	Scomber scrombus (Atlantic mackerel)	Pelagic-neritic		51 (17.7)
Netherlands, Southern Bight, North Sea	Sprattus sprattus (Sprat)	Pelagic	GIT	400 (0.25)	2		0.3 - 0.4	spherical particles	PMMA/acrylic	ATR-FTIR	+	Hermsen et al. 2017
Denmark, North Sea and Baltic Sea	Gadus morhua (Atlantic cod, North Sea)	Brackish, benthopelagic	Stomach	28 (14)			0.5 - 1 (fragment) and 0.3 - 10 (fibre)	Fragment, fibre	PU, PS, PP, PE	Raman spectroscopy	NR	Lenz et al. 2016
	Gadus morhua (Atlantic cod, Baltic Sea)			51 (16)			1.4 - 5.6 (fragment) and 0.2 - 5.8 (fibre)
	Clupea harengus (Atlantic herring, North Sea)	Pelagic		50 (30)			0.16 - 2.5 (fragment) and 0.35 - 57 (fibre)
	Clupea harengus (Atlantic herring, Baltic Sea)			55 (7)			0.45 - 4.6 (fibre)
Sweden, coast	Clupea harengus (Atlantic herring)	Pelagic	Stomach	130 (50)	0 - 53		NR	fibres, fragments	NR	Stereomicroscopy	+	Ogonowski et al. 2017
UK, Thames Estuary	Platichthys flesus (Baltic flounder)	Demersal	GIT				NR	fibres	PA, acrylic, nylon, PE, PET	Microscopic dissection, ATR-FTIR	+	Mcgoran et al. 2017
	- Riverine 1			40 (90)	0.43 ± 0.75
	- Estuarine			14 (71)	0.33 ± 0.49
	- Riverine 2			12 (83)	0.85 ± 1.17
	Osmerus eperlanus (Smelt)	Pelagic		10 (20)	0.2 ± 0.42
Africa
South Africa, KwaZulu-Natal, Durban Harbor	Mugil cephalus (Black mullet)	Demersal	GIT	72.8	3.8 ± 4.7		0.2 - 15	Fibres, fragments, films, monofilament, and twine	PS, the others are not clarified	Microscopic dissection	+	Naidoo et al. 2016
North America
USA, California, Half Moon Bay	Atherinopsis californiensis (Jack silverside)	Pelagic	GIT	7 (28.6)	1.6 ± 3.7		Length: 6.3 ± 6.7; Width: 0,01 - 2,1	fibres, fragments	NR	Microscopic dissection	+	Rochman et al. 2015
	Engraulis mordax (Anchovy)	Pelagic		10 (30)	0.3 ± 0.5			fibres, film, monofilament
	Morone saxatilis (Stripped bass)	Pelagic		7 (28.6)	0.9 ± 1.2			film, fibre, foam
	Oncorhynchus tshawytscha (Chinook salmon)	Pelagic		4 (25)	0.25 ± 0.5			fiber
	Ophiodon elongatus (Lingcod)	Pelagic		11 (9.1)	0.1 ± 0.3			film
Canada, eastern coast Newfoundland	Gadus marhua (Atlantic cod)	Brackish, bentho-pelagic	GIT	205 (0.98)	1 - 2		Length: 6.06 ± 1.17; Width: 0.772 ± 0.398; Height: 2.23 ± 0.594	fragment	NR	Visual and microsopic dissection	+	Liboiron et al. 2016
South America
Argentina, Rio de la Plata estuary	Luciopimelodus pati (Pati)	Demersal	GIT	9 (100)	18.5 ± 18.9 (fibres); 0.7 ± 1.7 (others)		NR	fibres, others (regular and irregular shapes)	NR	Stereomicroscopy	+	Pazos et al. 2017
	Pseudoplatystoma corruscans (Spotted sorubim)	Demersal		2 (100)
	Oligosarcus oligolepis (Bocudo)	Pelagic		5 (100)
	Parapimelodus valenciennis (Long-whiskered catfish)	Demersal		21 (100)
	Odontesthes bonariensis (Pejerrey)	Brackish		1 (100)
	Astyanax rutilus	Bentho-pelagic		12 (100)
	Cyprinus carpio (Common carp)	Pelagic		2 (100)
	Pimelodus maculatus (Long-whiskered catfish)	Bentho-pelagic		14 (100)
	Prochilodus lineatus (Streaked prochilod)	Bentho-pelagic		5 (100)
	Hypostomus commersoni (Red fin Uruguay)	Demersal		2 (100)
	Cyphocharax voga (Characin)	Bentho-pelagic		14 (100)
Brazil, Paraiba and Mamanguape estuaries	Opisthonema oglinum (Atlantic thread herring)	Pelagic	GIT	196 (9)	0.33		0.01 - 0.5	Fibres, films, and fragments	NR	Stereomicroscopy		Vendel et al. 2017
	Rhinosardinia bahiensis	Pelagic			0.35
	Anchoa januaria (Rio anchovy)	Pelagic-neritic			0.13
	Lycengraulis grossidens (Atlantic sabretooth anchovy)	Pelagic-neritic			0.17
	Atherinella brasiliensis (Brazilian silverside)	Benthopelagic			0.03
	Poecilia vivipara (Gargaru)	Benthopelagic			0.11
	Hyporhamphus unifasciatus (Common halfbeak)	Reefs			0.15
	Oligoplites saurus (Leatherjacket)	Reefs			0.17
	Diapterus auratus (Irish mojarra)	Demersal			0.97
	Diapterus rhombeus (Caitipa mojarra)	Demersal			0.06
	Eucinostomus argenteus (Silver mojarra)	Reefs			0.02
	Eugerres brasilianus (Brazilian mojarra)	Demersal			0.06
	Achirus lineatus	Reefs			0.5
	Symphurus tessellatus (Tesselated tonguefish)	Demersal			0.25
	Sphoeroides testudineus (Checkered puffer)	Reefs			0.09
Brazil, Goiana Estuary	Cynoscion acoupa (Acoupa weakfish)	coastal, demersal, brackish	Stomach				≤ 5	Filament	NR	Stereomicroscopy	+	Ferreira et al. 2016
	(juvenile: 14-220 mm)			469 (64)	1.8 - 2.5
	(sub-adult: 220-340 mm)			25 (50)	2 - 8
	(adult: >340 mm)			33 (100)	5.4 - 25.9
Brazil, Goiana Estuary	Stellifer brasiliensis (Stardrum)	Demersal	Stomach	330 (6.9)	0.33 ± 0.08		<1	fragments	PA	Stereomicroscopy	NR	Dantas et al. 2012
	Stellifer stellifer (Little croacker)	Brackish		239 (9.2)	0.52 ± 0.13
Chile, Easter Island, Rapa Nui	Decapterus muroadsi (Amberstripe cad)	Pelagic	GIT	20 (80)	2.5 ± 0.4		2.4 ± 0.4	Hard fragments, soft fragments, thread, film	PE, plastic paint (alkyd resins and epoxy-polyesters), PP	Microscopic dissection, ATR-FTIR and FTIR microscopy	NR	Ory et al. 2017
Mexico, estuary of the Gulf of Mexico	Lutjanus camphechanus (Red snapper)	Shallow waters, reefs	GIT	2	NR		Surface area: 0.313 ± 0.474 mm2 (filament) 0.186 ± 0.290 mm2 (fragment) 1.565 ± 5.589 mm2 (film)	filament, fragment, film	NR	Microscopic dissection, FTIR	NR	Phillips & Bonner, 2015
	Lutjanus griseus (Mangrove snapper)	Near shore, hard-bottom and coral		5
	Lagodon rhomboides (Bream)	Vegetated ottom, mangrove		48
	Sciaenops ocellatus (Red drum)	Brackish, demersal		28
	Cynoscion nebulosus (Spotted seatrout)	Brackish, demersal		20
	Paralichthys lethostigma (Southern flounder)	Estuarines, coastal waters		8
	Coryphaena hippurus (Common dolphinfish)	Open waters, near coastal areas		2
				Tota;: 116 (10.4)
PA: polyamide, PAN: polyacrylonitrile, PE: polyethylene, PET: polyethylene terephthalate, PL: polyester, PMMA: polymethylmethacrulate, PP: polypropylene, PS: polystyrene, PU: polyurethane; 1: average, average ± standard deviation or range, N = the number of collected samples, NR = Not Reported, unkn = unknown, QA = Quality Assurance, + = the study implemented measures to prevent microplastics con…

## Sheet: Action level
	Fish (particle/animal)		Shellfish (particle/g)
	1	1	2.1 - 10.5	6.3
	1.1	1.1	0.9 - 4.6	2.75
	0.3	0.3	0.35	0.35
	3.7	3.7	0.26 - 0.51	0.385
	3.3	3.3	0.36	0.36
	4	4	0.24	0.24
	2.1	2.1	0.2	0.2
	2.8	2.8	0.47	0.47
	4.6	4.6	0.35	0.35
	1.1	1.1	0	0
	3.7	3.7	13.125	13.125
	3	3	2.4 - 10.9	6.65
	4.2	4.2	2.5 - 3.8	3.15
	4.1	4.1	1.375	1.375
	7.2	7.2	0.64	0.64
	4.2	4.2	95th percentile	8.5925
	2.3	2.3		2.423
	1.9	1.9
	1	1
	0.8	0.8
	0.09	0.09
	1	1
	0.5	0.5
	2	2
	1.66	1.66
	0.57	0.57
	0.46	0.46
	3.8	3.8
	1.6	1.6
	0.3	0.3
	0.9	0.9
	0.25	0.25
	0.1	0.1
	0.33	0.33
	0.35	0.35
	0.13	0.13
	0.17	0.17
	0.03	0.03
	0.11	0.11
	0	0
	0.15	0.15
	0.17	0.17
	0.97	0.97
	0.06	0.06
	0.02	0.02
	0.06	0.06
	0.5	0.5
	0.25	0.25
	0.09	0.09
	2.5	2.5
	2.47 - 4.89	3.68
	95th percentile	4.2	1.55294
	4.3 - 57.2
	1.5 - 7.6
	1
	8.4
	11.3
	34
	75
